# Supplementary material for: Public Opinion and Sentiment Before and at the Beginning of COVID-19 Vaccinations in Japan: Twitter Analysis
Source: bioRxiv or medRxiv preprint supplement (doi:10.1101/2021.07.19.21260735), 2021-12-31
Supplement: Supplementary file [file media-1.pdf]

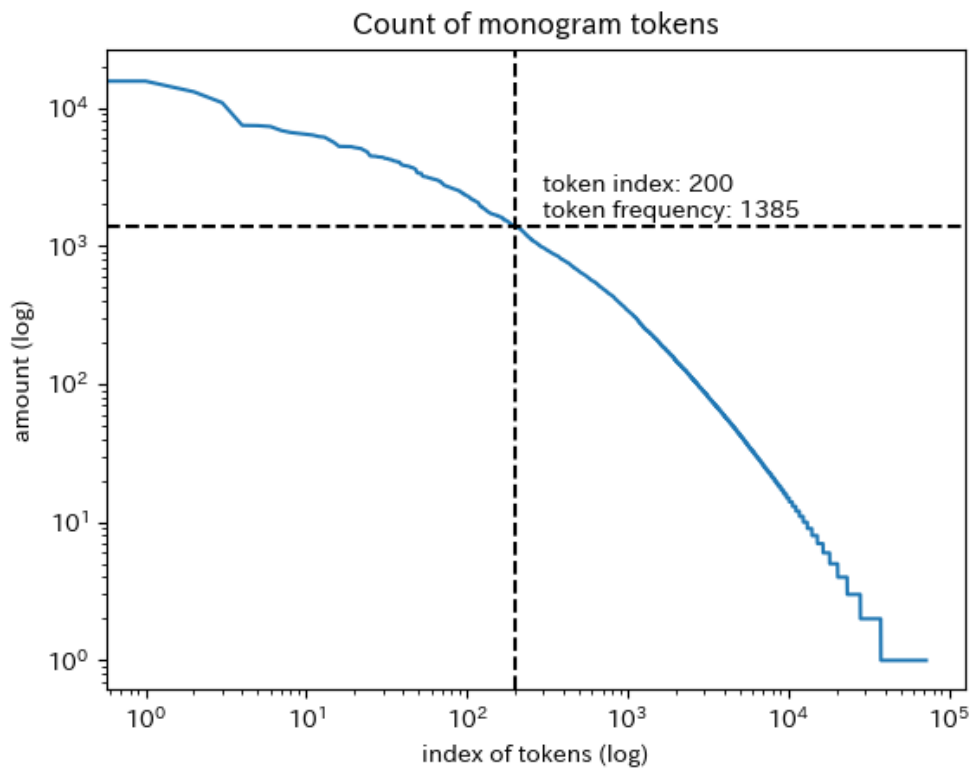

Figure 1 Count of monogram (unigram) tokens. The horizontal axis is the index of tokens by the frequency of appearance and the vertical axis is the count of appearance of the tokens.

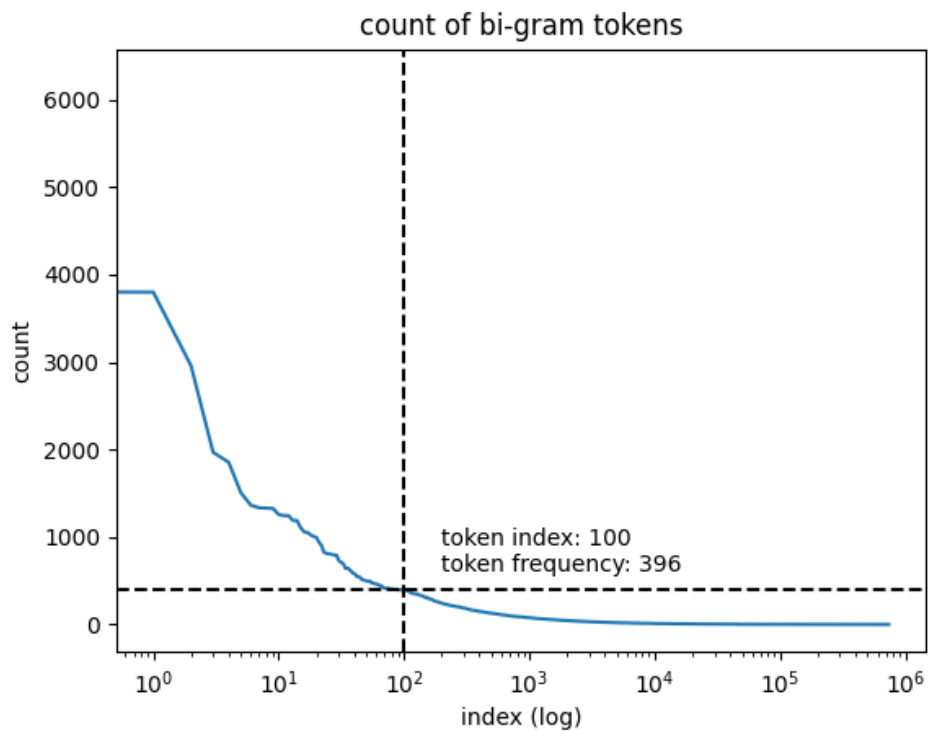

Figure 2 Count of bigram tokens. The horizontal axis is the index of tokens by the frequency of appearance and the vertical axis is the count of appearance of the tokens.

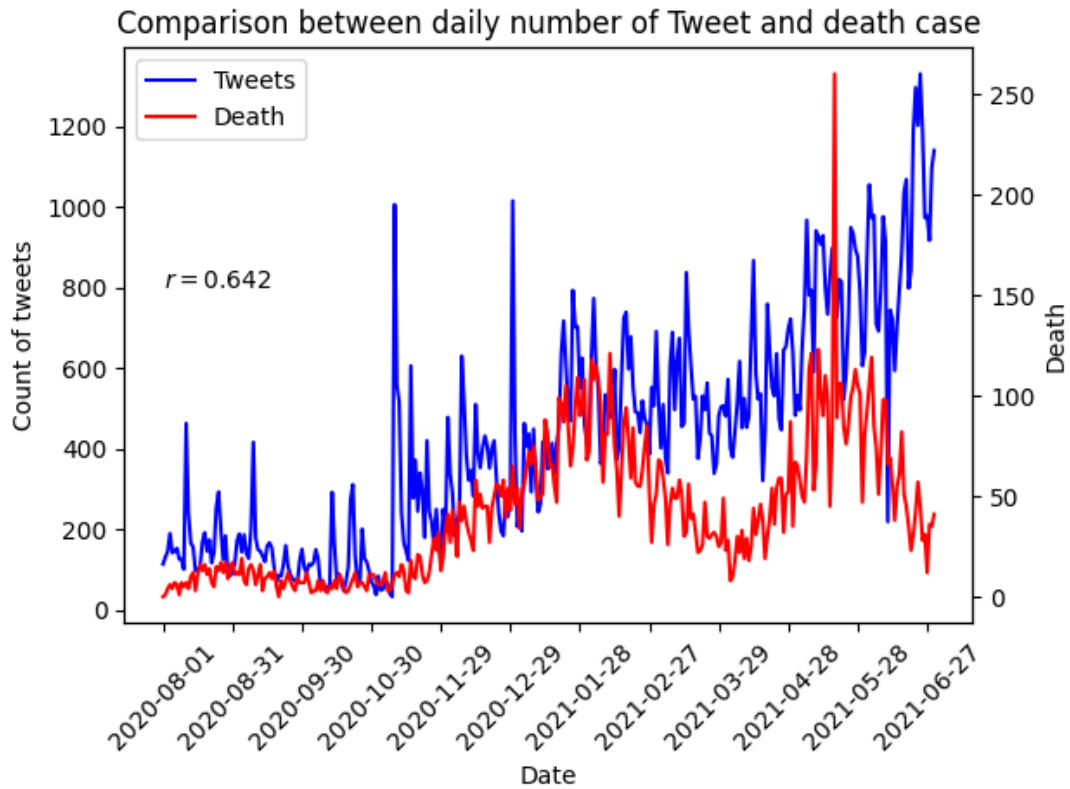

Figure 3. Comparison between daily number of tweets and death case;  $r=0.648$ .

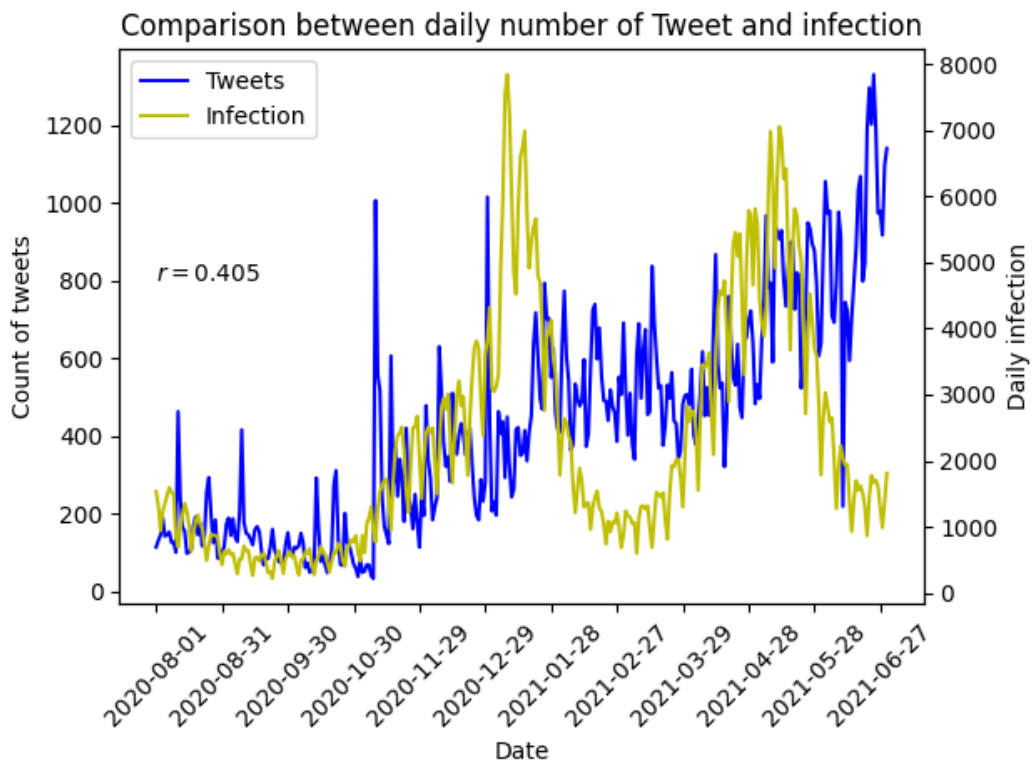

Figure 4. Comparison between daily number of tweets and infection case;  $r=0.411$ .

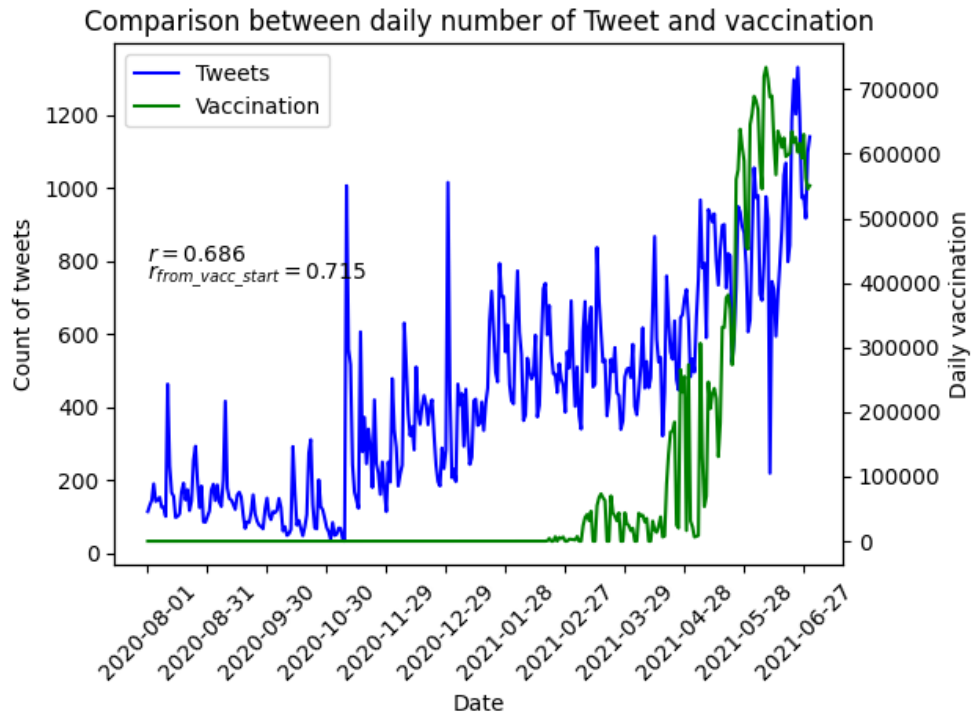

Figure 5. Comparison between daily number of tweets and vaccination;  $r=0.681$ , correlation coefficient from the first vaccination in Japan is 0.711.



top words of vaccines

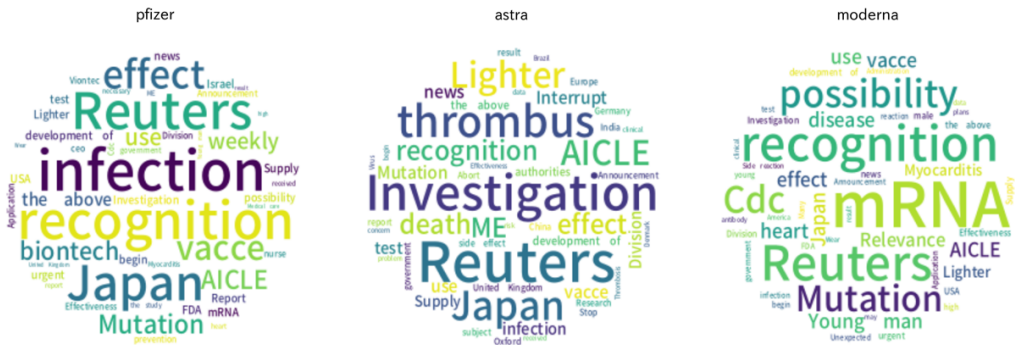

Figure 8. The top-50 words for each vaccine brand.

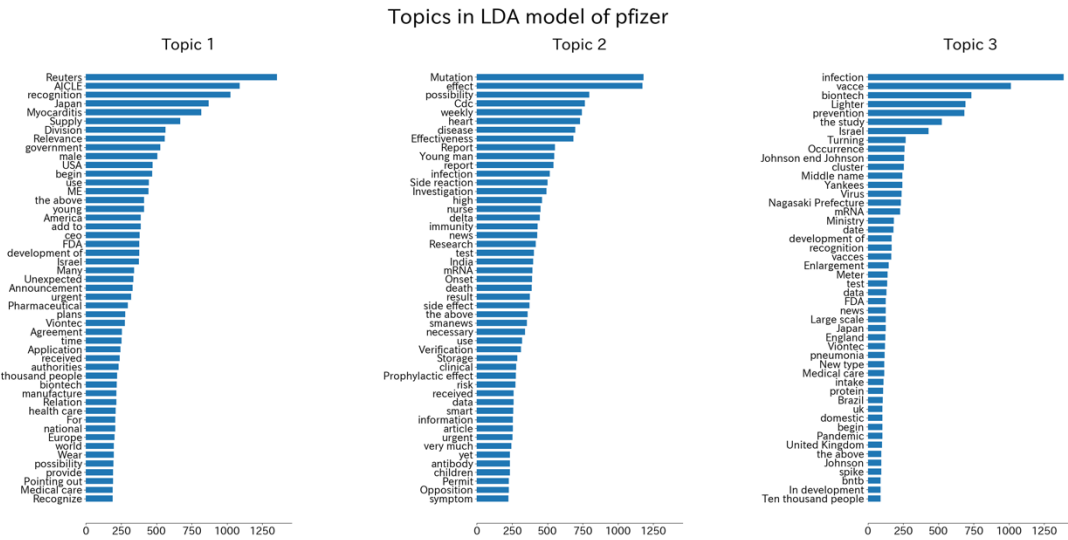

Figure 9. Top-50 words of three LDA topics for tweets related to Pfizer vaccine (English version).

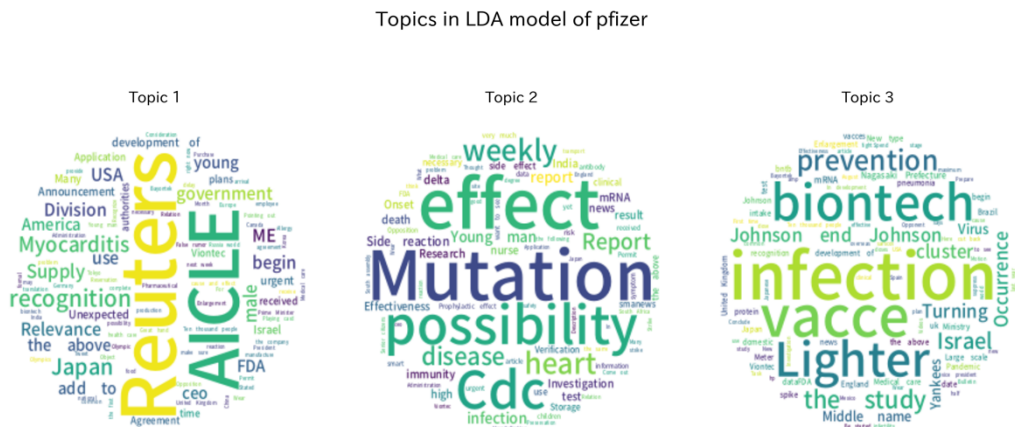

Figure 10. Word cloud of three LDA topics for tweets related to Pfizer vaccine (English version).

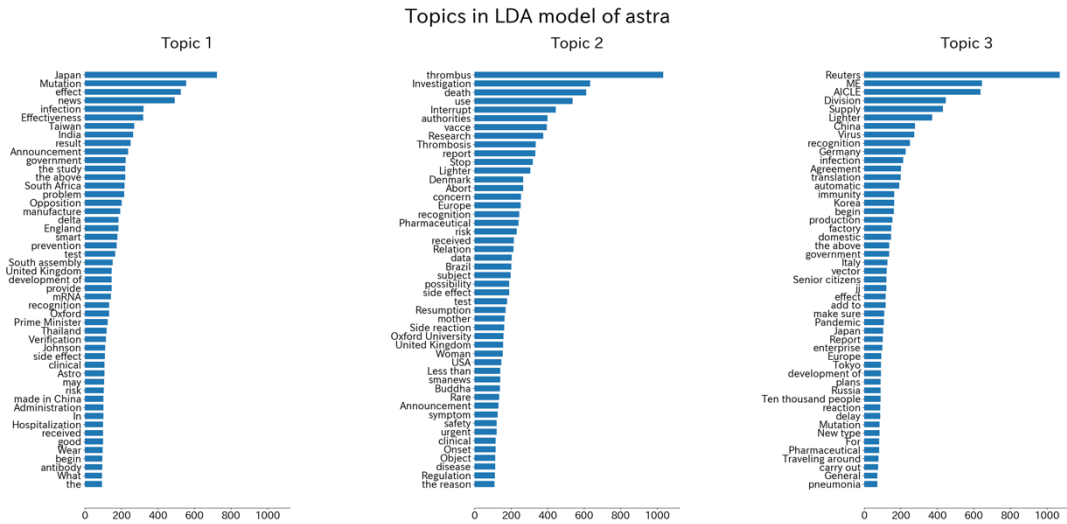

Figure 11. Top-50 words of three LDA topics for tweets related to AstraZeneca vaccine (English version).

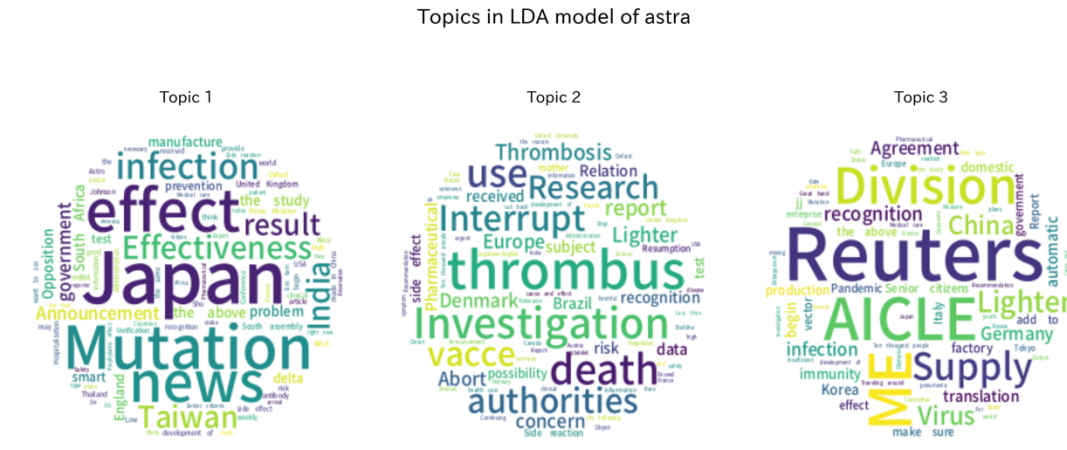

Figure 12. Word cloud of three LDA topics for tweets related to AstraZeneca vaccine (English version).

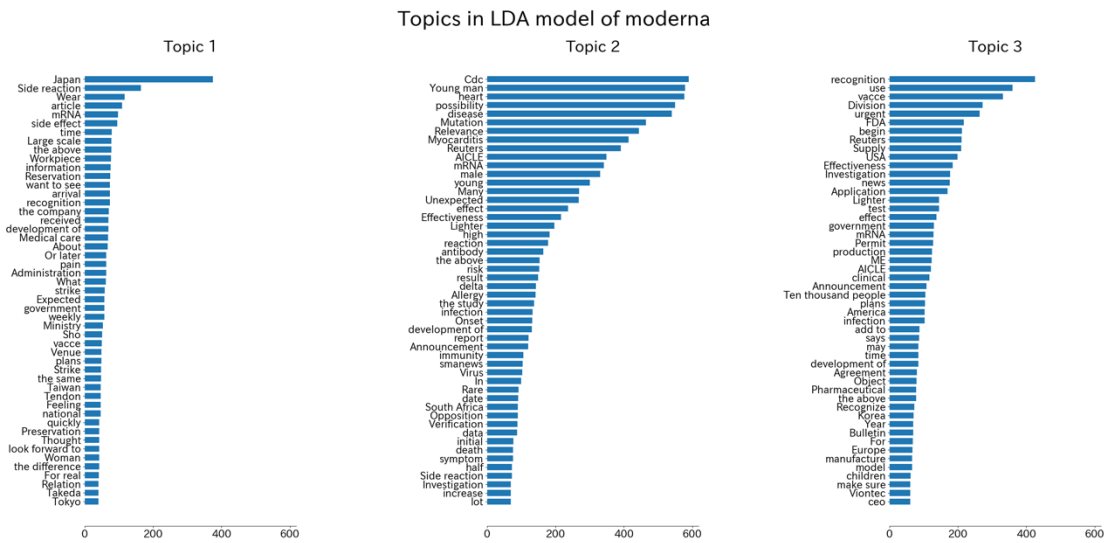

Figure 13. Top-50 words of three LDA topics for tweets related to Moderna vaccine (English version).





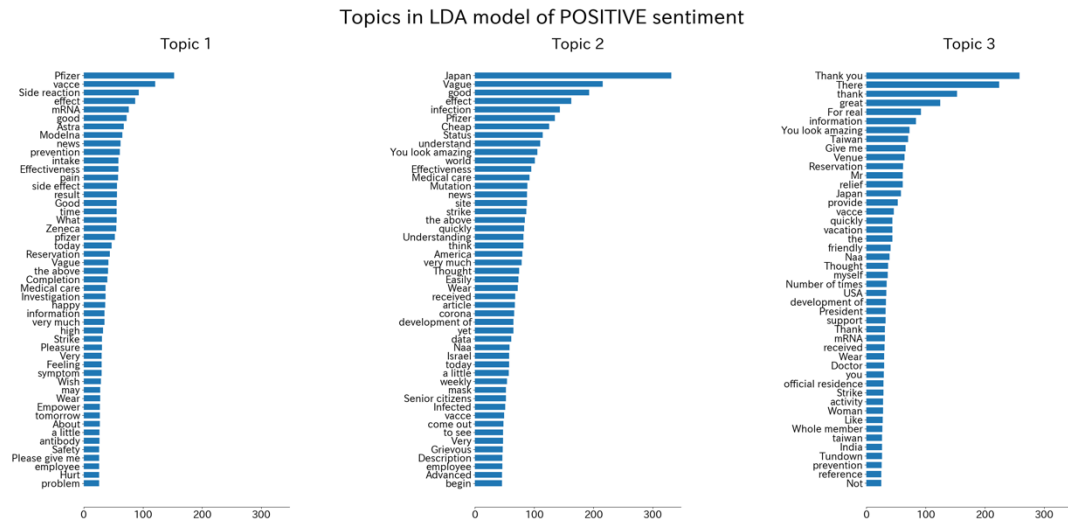

Figure 15. Top-50 words of three LDA topics for positive tweets (English version).

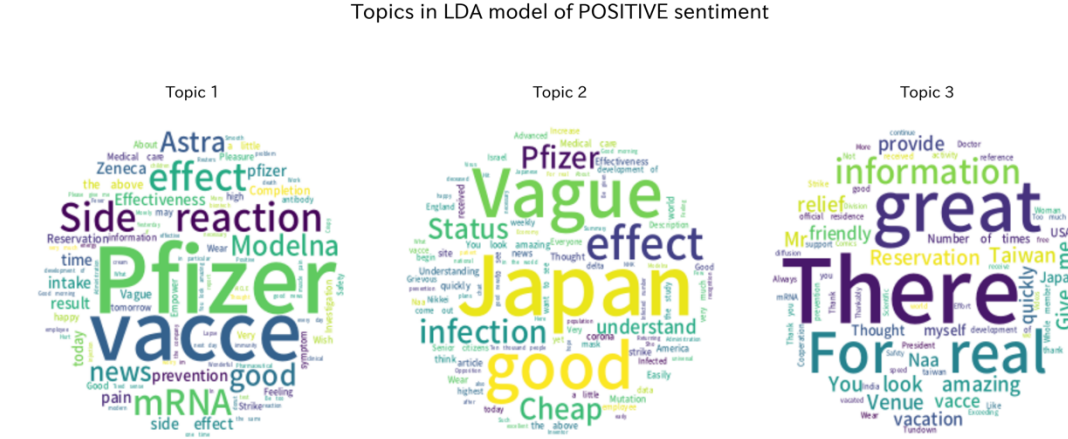

Figure 16. Word cloud of three LDA topics for positive tweets (English version).

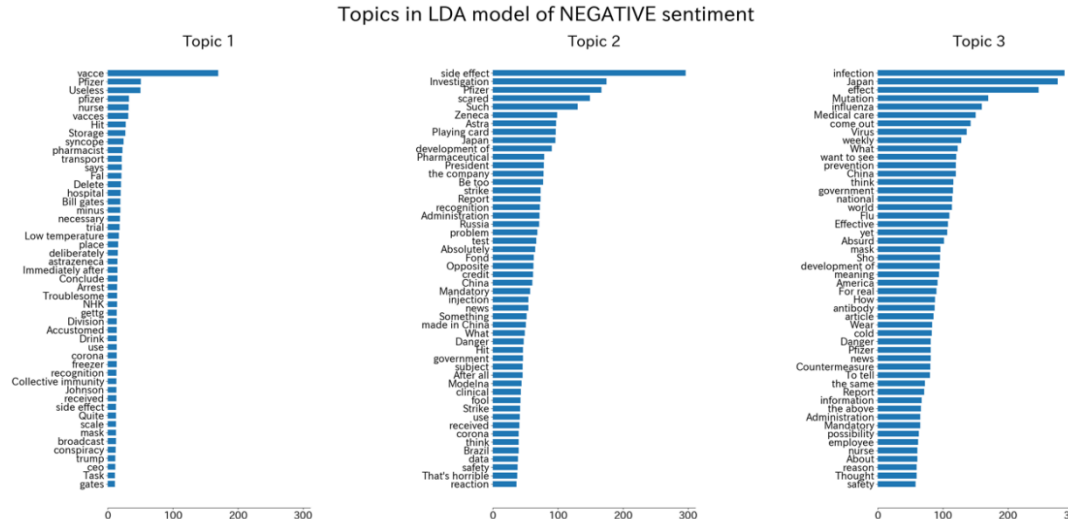

Figure 17. Top-50 words of three LDA topics for negative tweets (English version).



Topics in LDA model of NEGATIVE sentiment

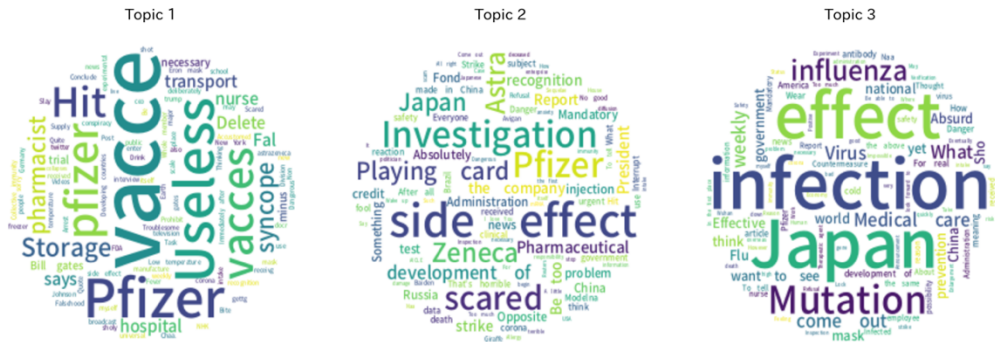

Figure 18. Word cloud of three LDA topics for negative tweets (English version).

Topics in LDA model of NEUTRAL sentiment

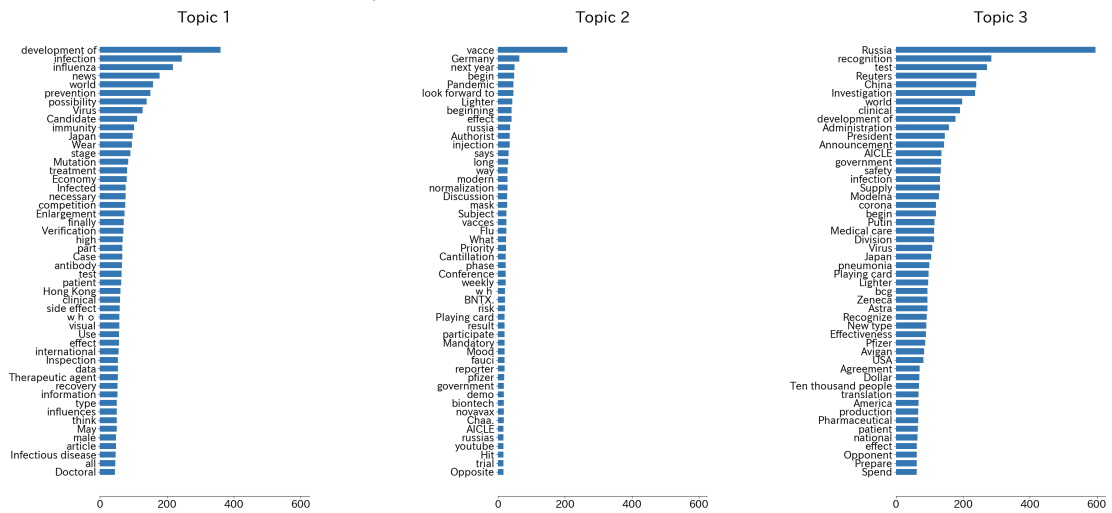

Figure 19. Top-50 words of three LDA topics for neutral tweets (English version).

Topics in LDA model of NEUTRAL sentiment

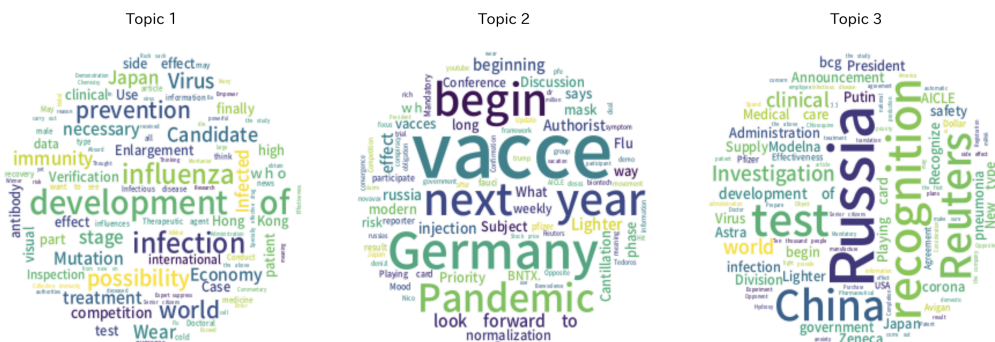

Figure 20. Word cloud of three LDA topics for neutral tweets (English version).

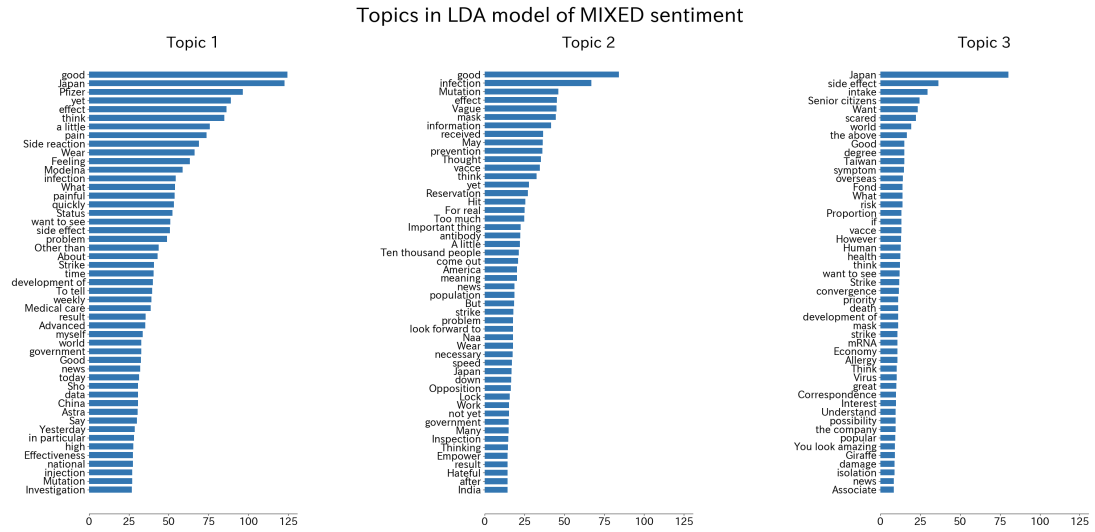

Figure 21. Top-50 words of three LDA topics for mixed tweets (English version).

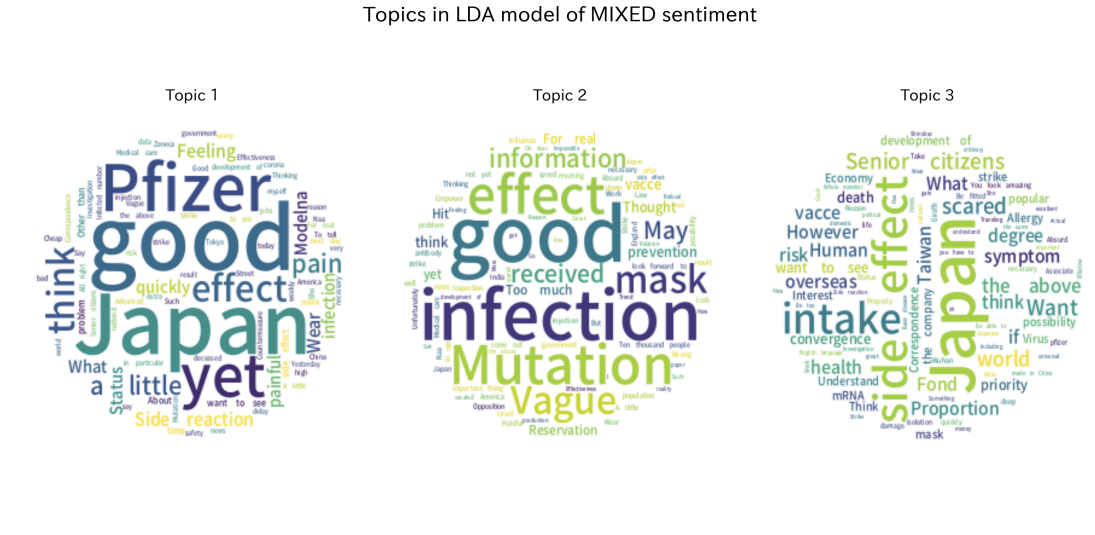

Figure 22. Word cloud of three LDA topics for mixed tweets (English version).
